# Supplementary material for: Role of processing parameters in CVD grown crystalline monolayer MoSe2
Source: Royal Society of Chemistry journal article supplement (doi:10.1039/d2ra00387b), 2022-01-01
Supplement: d2ra00387b1.pdf [file d2ra00387b1.pdf]

Electronic Supplementary Material (ESI) for Materials Chemistry Frontiers.  
This journal is © the Partner Organisations 2022

## Supplementary Material

### Role of processing parameters in CVD grown crystalline monolayer MoSe<sub>2</sub>

Girija Shankar Papanai<sup>a,b</sup>, Krishna Rani Sahoo<sup>c</sup>, Betsy Reshma G<sup>b,d</sup>, Sarika Gupta<sup>e</sup> and Bipin Kumar Gupta<sup>a,b,\*</sup>

<sup>a</sup>*Photonic Materials Metrology Sub Division, Advanced Materials and Device Metrology Division, CSIR-National Physical Laboratory, Dr. K. S. Krishnan Marg, New Delhi 110012, India*

<sup>b</sup>*Academy of Scientific and Innovative Research (AcSIR), Ghaziabad 201002, India*

<sup>c</sup>*Tata Institute of Fundamental Research - Hyderabad, Sy. No 36/P Serilingampally, Mandal, Gopanpally Village, Hyderabad 500046, India*

<sup>d</sup>*CSIR-Institute of Genomics and Integrative Biology, Mathura Road, New Delhi 110025, India*

<sup>e</sup>*Molecular Sciences Lab, National Institute of Immunology, Aruna Asaf Ali Marg, New Delhi 110067, India*

\*E-mail: bipinbhu@yahoo.com

The contents of electronic supplementary material are listed as follows-

**S1. The schematic diagram of the CVD reaction chamber**

**S2. X-ray Diffraction of MoO<sub>3</sub> powder and Se pellets**

**S3. AFM of monolayer MoSe<sub>2</sub> flakes over Si/SiO<sub>2</sub> substrate**

**S4. Absorption spectrum of MoSe<sub>2</sub> flakes on the quartz substrate**

**S5. Excitonic peak energies in as-synthesized monolayer MoSe<sub>2</sub> and as-obtained shapes**

**S6. PL imaging of MoSe<sub>2</sub> flake having distorted hexagonal shape**

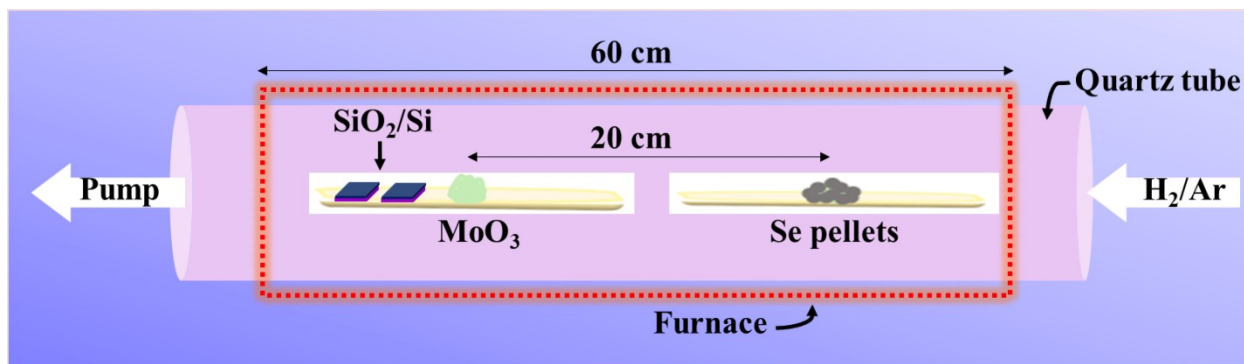

**Figure S1.** The schematic diagram of the CVD reaction chamber for growth of monolayer MoSe<sub>2</sub> flakes. The notations have their usual meaning.

## S2. X-ray Diffraction of MoO<sub>3</sub> powder and Se pellets

XRD has been performed to check the quality of precursors prior to the synthesis of monolayer MoSe<sub>2</sub>. Figure S2a shows the XRD pattern of MoO<sub>3</sub> powder, and the peak positions are well indexed with the orthorhombic MoO<sub>3</sub> [JCPDS card (Reference code: 00-005-0508)]. The XRD pattern of Se pellets is illustrated in Fig. S2b, and the peak positions are indexed with the hexagonal Se [JCPDS card (Reference code: 98-002-2251)].

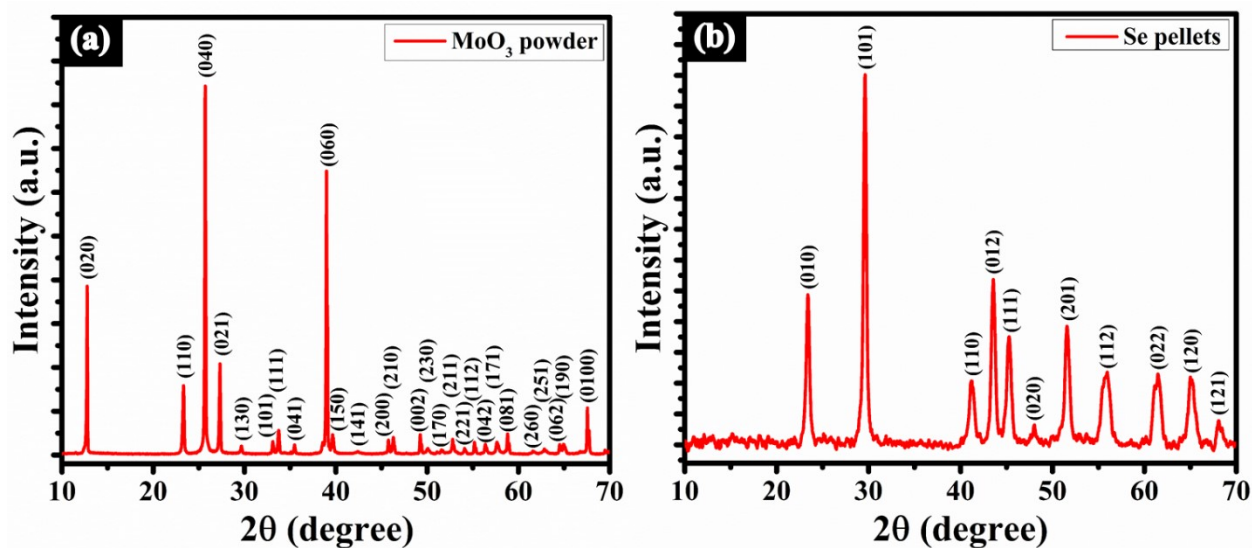

**Figure S2.** X-ray diffraction pattern of (a) MoO<sub>3</sub> powder and (b) Se pellets.

### S3. AFM of monolayer MoSe<sub>2</sub> flakes over Si/SiO<sub>2</sub> substrate

AFM has been carried out to know the thickness of as-synthesized MoSe<sub>2</sub> flakes. Figure S3a shows the topographic image of MoSe<sub>2</sub> flakes at Si/SiO<sub>2</sub> substrate. The roughness parameters, *i.e.*, root mean square (image Rq) and average (image Ra) have been obtained to be ~5.8 and 1.8 nm, respectively. Figure S3b shows height profile along the green dotted line, where thickness has been found to be ~1.6 nm. On the other hand, the topographic image of ST shape of MoSe<sub>2</sub> flakes has been shown in Fig.S3c, having image Rq and image Ra values of ~7.4 and 3.2 nm. The height profile of ST shape along the green dotted line has been displayed in Fig.S3d, where the thickness has been observed to be ~2.8 nm. The variation in thickness of MoSe<sub>2</sub> flakes at two different locations suggests that the local changes occur in the precursor's ratio during growth. In earlier reports, the thickness of monolayer MoSe<sub>2</sub> is obtained in the range of 0.7 to 1 nm.<sup>1-3</sup> However, in the present work, obtained thickness has deviated from the monolayer thickness at both locations on same substrate. This deviation might be attributed to two reasons :(i) non-uniformity of the SiO<sub>2</sub> layer over Si substrate and (ii) trapped adsorbates between MoSe<sub>2</sub> flakes and substrate.

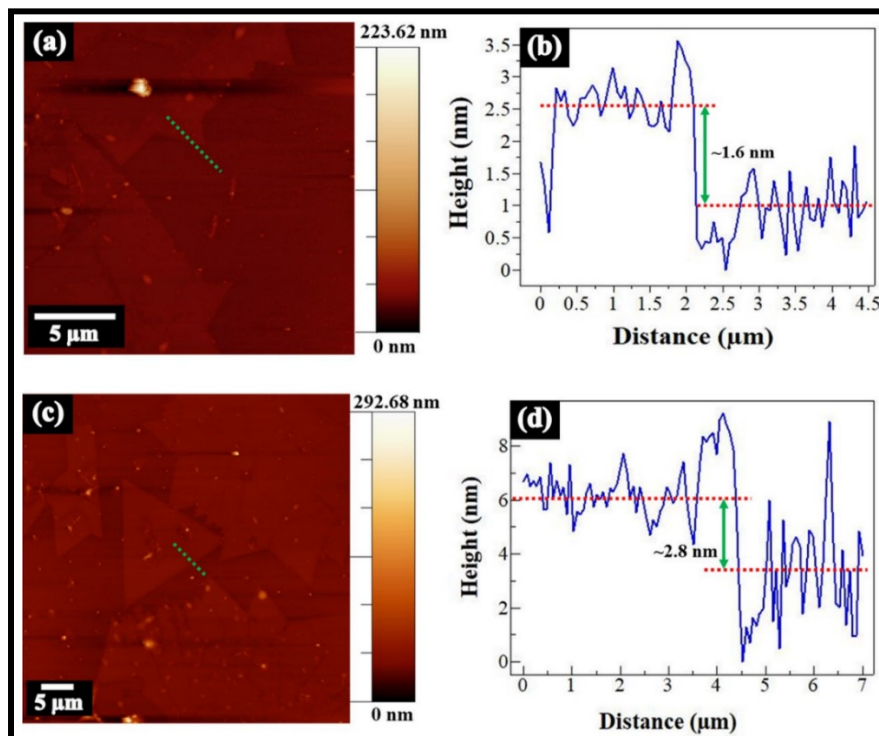

**Figure S3.** AFM topographic image of the as-synthesized MoSe<sub>2</sub> flakes on two different locations over Si substrate having SiO<sub>2</sub> thickness of 300 nm: (a) topographic image at the first location and (b) corresponding height profile across the green dotted line; (c) topographic

image at the second location of the same substrate and (d) height profile of ST shape along the green dotted line.

#### S4. Absorption spectrum on MoSe<sub>2</sub> flakes on the quartz substrate

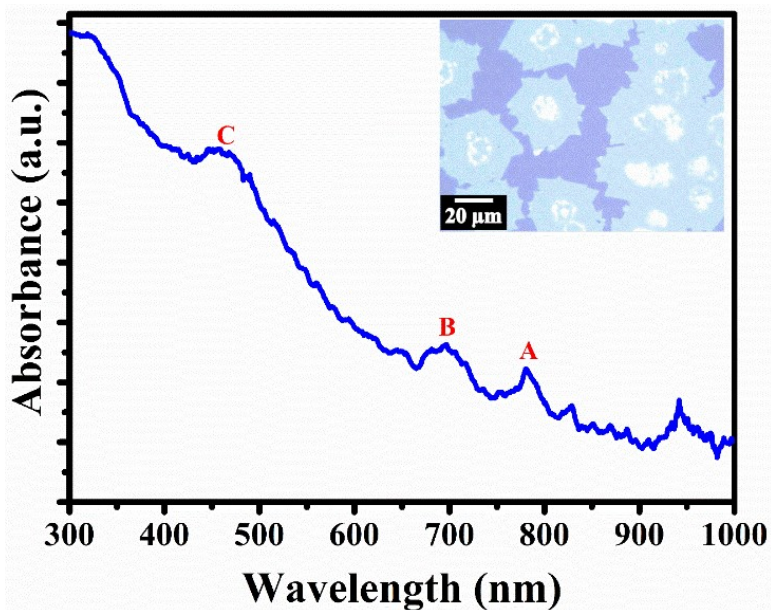

**Figure S4.** The absorption spectrum of monolayer MoSe<sub>2</sub> over quartz substrate and the inset shows the optical image of monolayer MoSe<sub>2</sub> flakes deposited on the quartz substrate.

Figure S4 displays the absorption spectrum of the monolayer MoSe<sub>2</sub> flakes over a quartz substrate. Inset shows the optical image of MoSe<sub>2</sub> flakes on the quartz substrate. One can observe the three excitonic states from Fig. S4, A exciton (~781 nm), B exciton (~696 nm), and C exciton (~457 nm), respectively. The A exciton state arises due to the direct excitonic transition at the K point in the *k*-space. The B exciton emerged from a spin-orbit split-off band, and C exciton originated because of nearly degenerate exciton states.<sup>4</sup>

S5. Excitonic peak energies in as-synthesized monolayer MoSe<sub>2</sub> and as-obtained shapes

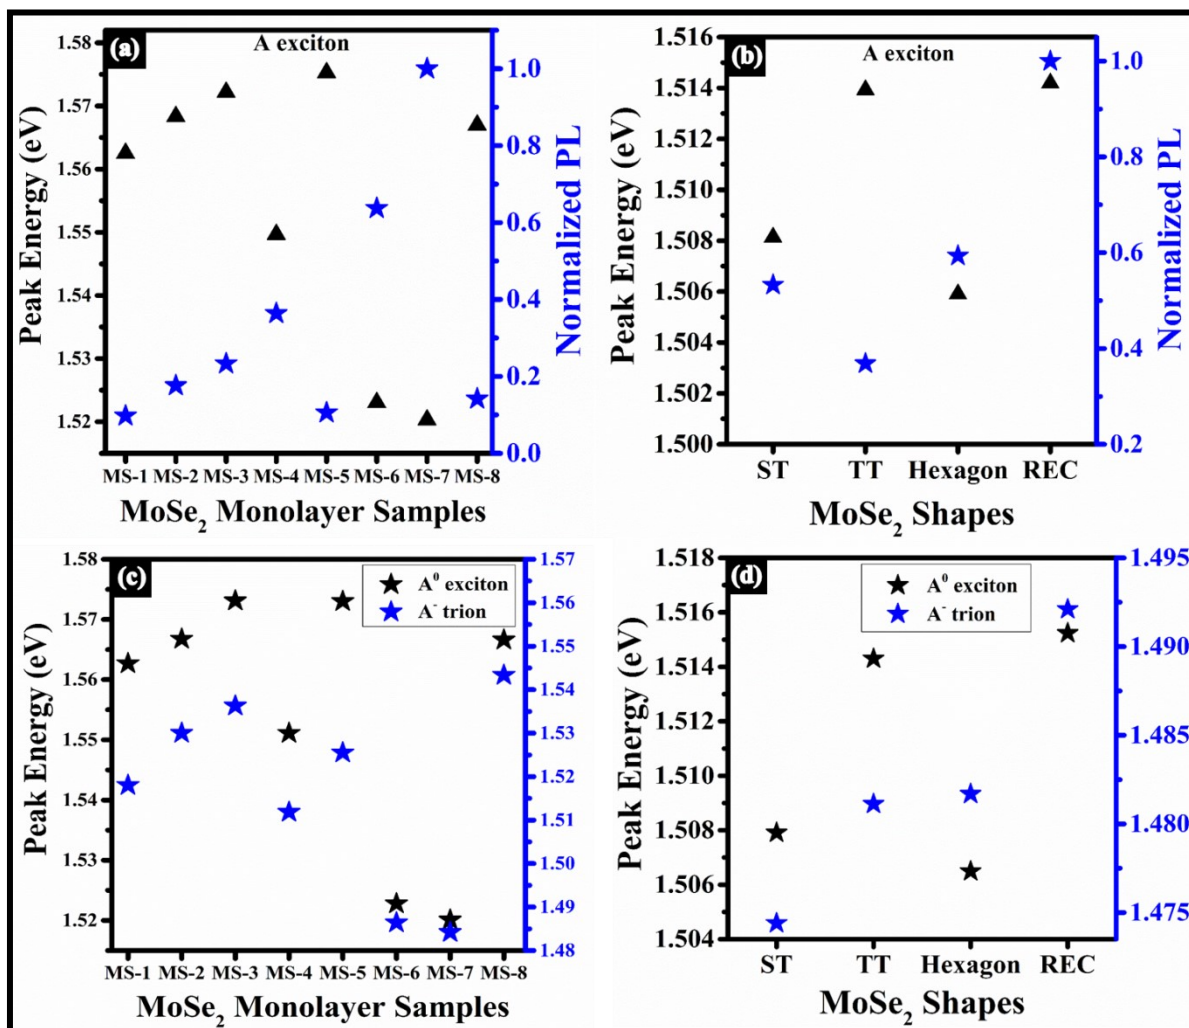

**Figure S5.** Peak energy of A exciton (left vertical axis) and normalized PL (right vertical axis) in (a) as-synthesized samples (MS-1 to MS-8) and (b) as-obtained shapes. Peak energy of A<sup>0</sup> exciton (left vertical axis) and A<sup>-</sup> trion (right vertical axis): (c) as-synthesized samples and (d) as-obtained shapes.

## S6. PL imaging of MoSe<sub>2</sub> flake having distorted hexagonal shape

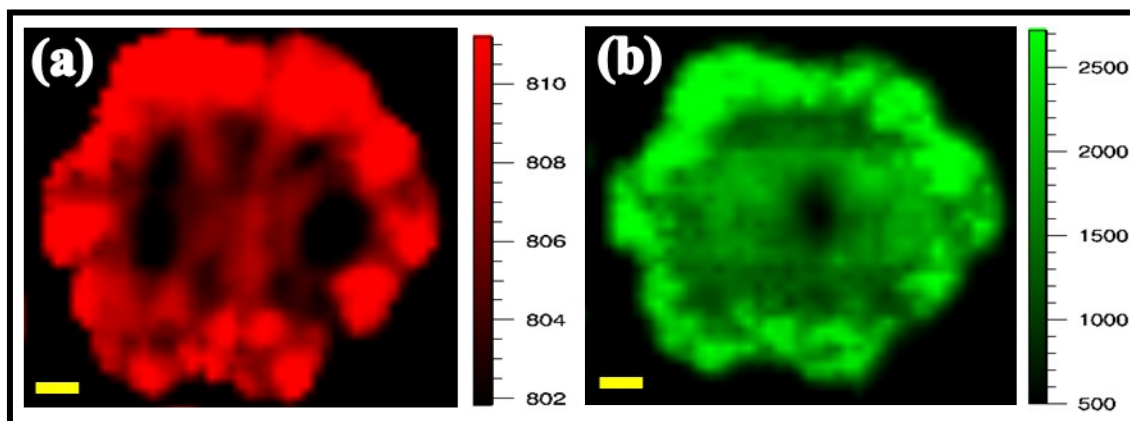

**Figure S6.** PL imaging of distorted hexagonal shape: (a) peak position and (b) peak intensity.

### References:

- 1 J. C. Shaw, H. Zhou, Y. Chen, N. O. Weiss, Y. Liu, Y. Huang and X. Duan, Chemical vapor deposition growth of monolayer MoSe<sub>2</sub> nanosheets, *Nano Res.*, 2014, **7**, 511–517.
- 2 X. Lu, M. I. B. Utama, J. Lin, X. Gong, J. Zhang, Y. Zhao, S. T. Pantelides, J. Wang, Z. Dong, Z. Liu, W. Zhou and Q. Xiong, Large-Area Synthesis of Monolayer and Few-Layer MoSe<sub>2</sub> Films on SiO<sub>2</sub> Substrates, *Nano Lett.*, 2014, **14**, 2419–2425.
- 3 Y.-H. Chang, W. Zhang, Y. Zhu, Y. Han, J. Pu, J.-K. Chang, W.-T. Hsu, J.-K. Huang, C.-L. Hsu, M.-H. Chiu, T. Takenobu, H. Li, C.-I. Wu, W.-H. Chang, A. T. S. Wee and L.-J. Li, Monolayer MoSe<sub>2</sub> Grown by Chemical Vapor Deposition for Fast Photodetection, *ACS Nano*, 2014, **8**, 8582–8590.
- 4 D. Kozawa, R. Kumar, A. Carvalho, K. Kumar Amara, W. Zhao, S. Wang, M. Toh, R. M. Ribeiro, A. H. Castro Neto, K. Matsuda and G. Eda, Photocarrier relaxation pathway in two-dimensional semiconducting transition metal dichalcogenides, *Nat Commun*, 2014, **5**, 4543.
